# Supplementary material for: ATRvD1 Attenuates Renal Tubulointerstitial Injury Induced by Albumin Overload in Sepsis-Surviving Mice
Source: Preprints.org preprint supplement (doi:10.20944/preprints202107.0460.v1), 2021-07-20
Supplement: Supplementary file 2 [file supplementary]

Table S1 – Sequence primers used for Real Time PCR

| Target             | Primer sequence           |                             | Sequence source |
|--------------------|---------------------------|-----------------------------|-----------------|
|                    | Forward                   | Reverse                     |                 |
| IL-4               | TTGAACGAGGTCACAGGAGAAG    | AGGACGTTTGGCACATCCA         | M29854.1        |
| IL-10              | GATGCCCCAGGCAGAGAA        | CACCCAGGGAATTCAAATGC        | NM_010548.2     |
| TNF- $\alpha$      | CACAAGATGCTGGGACAGTGA     | TCCTTGATGGTGGTGCATGA        | NM_013693.2     |
| TGF $\beta$        | GCAGTGGCTGAACCAAGGA       | AGCAGTGAGCGCTGAATCG         | NM_011577.1     |
| Fibronectin        | GTGTAGCACAACCTCCAATTACGAA | GGAATTTCCGCCTCGAGTCT        | NM_010233.1     |
| Collagen I         | CTTCACCTACAGCACCTTGTG     | TGACTGTCTTGCCCCAAGTTC       | NM_007742.3     |
| Collagen III       | AAGGCGAATTCAAGGCTGAA      | TGTGTTTAGTACAGCCATCCTCTAGAA | NM_009930.2     |
| Collagen IV        | ACGGGCCAACGCTTCTTC        | CATGATCCCAGTCTTTGAGCTCTA    | NM_009932.3     |
| RPLP0 <sup>a</sup> | GCCAGCTCAGAACACTGGTCTA    | ATGCCCAAAGCCTGGAAGA         | NM_007475.5     |

a: large ribosomal protein, P0.
