# Supplementary material for: ATRvD1 Attenuates Renal Tubulointerstitial Injury Induced by Albumin Overload in Sepsis-Surviving Mice
Source: Preprints.org preprint supplement (doi:10.20944/preprints202107.0460.v1), 2021-07-20
Supplement: Supplementary file 3 [file supplementary]

Archive with 2 entries (2 files):
- Supplementary Materials.pdf
- Supplementary Table 1.pdf
